# Supplementary material for: The Anti-Diabetic Drug Metformin Rescues Aberrant Mitochondrial Activity and Restrains Oxidative Stress in a Female Mouse Model of Rett Syndrome
Source: PubMed Central journal article supplement (PMC7355965; doi:10.3390/jcm9061669), 2020-06-01
Supplement: jcm-09-01669-s001.pdf [file jcm-09-01669-s001.pdf]

## Supplementary information

**Table S1 – Summary of two-way ANOVA analyses and *post hoc* tests of all the results.**

| Target                                                   | Genotype                                    | Treatment                                   | Genotype*Treatment Interaction           | <i>Post hoc</i><br>WT,sal VS RTT,sal | <i>Post hoc</i><br>RTT,sal VS RTT,met |
|----------------------------------------------------------|---------------------------------------------|---------------------------------------------|------------------------------------------|--------------------------------------|---------------------------------------|
| Mitochondrial ATP production                             | <b>F<sub>(1,8)</sub>=17.067; p=0.003</b>    | <b>F<sub>(1,8)</sub>=19.267; p=0.003</b>    | <b>F<sub>(1,8)</sub>=13.067; p=0.007</b> | **p<0.01                             | **p<0.01                              |
| ATP (brain levels)                                       | <b>F<sub>(1,8)</sub>=74.604; p&lt;0.001</b> | <b>F<sub>(1,8)</sub>=48.009; p=0.001</b>    | <b>F<sub>(1,8)</sub>=42.892; p=0.002</b> | **p<0.01                             | **p<0.01                              |
| Complex I (activity)                                     | F <sub>(1,8)</sub> =0.000                   | F <sub>(1,8)</sub> =0.047; p=0.835          | F <sub>(1,8)</sub> =0.186; p=0.677       | NS                                   | NS                                    |
| Complex II (activity)                                    | F <sub>(1,8)</sub> =5.042; p=0.055          | <b>F<sub>(1,8)</sub>=7.042; p=0.029</b>     | <b>F<sub>(1,8)</sub>=9.375; p=0.016</b>  | **p<0.01                             | **p<0.01                              |
| Complex V (activity)                                     | F <sub>(1,8)</sub> =2.458; p=0.156          | F <sub>(1,8)</sub> =3.220; p=0.110          | F <sub>(1,8)</sub> =5.223; p=0.052       | *p<0.05                              | *p<0.05                               |
| Complex I – NDUFB8 (protein expression levels)           | F <sub>(1,32)</sub> =0.210; p=0.650         | F <sub>(1,32)</sub> =1.821; p=0.188         | F <sub>(1,32)</sub> =0.661; p=0.423      | NS                                   | NS                                    |
| Complex II – SDHB (protein expression levels)            | <b>F<sub>(1,32)</sub>=8.098; p=0.009</b>    | F <sub>(1,32)</sub> =0.015; p=0.903         | <b>F<sub>(1,32)</sub>=10.99; p=0.003</b> | **p<0.01                             | **p<0.01                              |
| Complex III – UQCRC2 (protein expression levels)         | F <sub>(1,32)</sub> =2.024; p=0.164         | F <sub>(1,32)</sub> =0.685; p=0.414         | F <sub>(1,32)</sub> =2.247; p=0.143      | *p<0.05                              | NS                                    |
| Complex IV – MTCO1 (protein expression levels)           | F <sub>(1,32)</sub> =0.806; p=0.377         | F <sub>(1,32)</sub> =0.889; p=0.354         | F <sub>(1,32)</sub> =1.582; p=0.219      | NS                                   | NS                                    |
| Complex V – ATP5A (protein expression levels)            | F <sub>(1,32)</sub> =2.892; p=0.099         | F <sub>(1,32)</sub> =1.043; p=0.315         | <b>F<sub>(1,32)</sub>=0.496; p=0.033</b> | NS                                   | *p<0.05                               |
| ROS (blood levels)                                       | F <sub>(1,9)</sub> =4.972; p=0.053          | F <sub>(1,9)</sub> =3.885; p=0.080          | <b>F<sub>(1,9)</sub>=12.732; p=0.006</b> | **p<0.01                             | **p<0.01                              |
| HNE-adducts (protein expression levels)                  | F <sub>(1,32)</sub> =1.844; p=0.185         | F <sub>(1,32)</sub> =1.696; p=0.203         | <b>F<sub>(1,32)</sub>=5.153; p=0.031</b> | **p<0.01                             | *p<0.05                               |
| PGC-1α (protein expression levels)                       | <b>F<sub>(1,32)</sub>=5.349; p=0.027</b>    | <b>F<sub>(1,32)</sub>=29.99; p&lt;0.001</b> | F <sub>(1,32)</sub> =2.111; p=0.156      | *p<0.05                              | ***p<0.001                            |
| mtTFA (protein expression levels)                        | F <sub>(1,32)</sub> =1.175; p=0.287         | <b>F<sub>(1,32)</sub>=11.05; p=0.003</b>    | F <sub>(1,32)</sub> =0.212; p=0.648      | *p<0.05                              | NS                                    |
| OPA1 (protein expression levels)                         | <b>F<sub>(1,32)</sub>=4.225; p=0.047</b>    | F <sub>(1,32)</sub> =3.034; p=0.090         | F <sub>(1,32)</sub> =0.162; p=0.213      | NS                                   | *p<0.05                               |
| MFN2 (protein expression levels)                         | <b>F<sub>(1,32)</sub>=18.12; p=0.002</b>    | <b>F<sub>(1,32)</sub>=11.45; p=0.002</b>    | <b>F<sub>(1,32)</sub>=5.357; p=0.028</b> | NS                                   | ***p<0.001                            |
| p <sup>Ser40</sup> Nrf2/Nrf2 (protein activation levels) | <b>F<sub>(1,32)</sub>=5.022; p=0.033</b>    | <b>F<sub>(1,32)</sub>=18.86; p=0.002</b>    | <b>F<sub>(1,32)</sub>=8.328; p=0.007</b> | NS                                   | **p<0.01                              |
| Nrf2 (protein expression levels)                         | F <sub>(1,32)</sub> =3.631; p=0.067         | <b>F<sub>(1,32)</sub>=15.49; p=0.005</b>    | F <sub>(1,32)</sub> =4.050; p=0.054      | *p<0.05                              | **p<0.01                              |
| HO-1 (protein expression levels)                         | <b>F<sub>(1,32)</sub>=6.617; p=0.015</b>    | F <sub>(1,32)</sub> =1.598; p=0.215         | F <sub>(1,32)</sub> =0.976; p=0.330      | NS                                   | *p<0.05                               |
| GH score (General health evaluation)                     | <b>F<sub>(1,27)</sub>=8.716; p=0.006</b>    | F <sub>(1,27)</sub> =0.010; p=0.922         | F <sub>(1,27)</sub> =0.133; p=0.718      | NS                                   | NS                                    |
| Distance travelled (Open field test)                     | F <sub>(1,27)</sub> =1.289; p=0.266         | F <sub>(1,27)</sub> =3.453; p=0.074         | F <sub>(1,27)</sub> =0.031; p=0.860      | NS                                   | NS                                    |
| Latency to fall (Dowel test)                             | <b>F<sub>(1,27)</sub>=13.156; p=0.001</b>   | F <sub>(1,27)</sub> =0.055; p=0.817         | F <sub>(1,27)</sub> =0.055; p=0.817      | NS                                   | NS                                    |

The main effects of genotype and treatment as well as their interactions of all the analyses included in the present article were reported. For each factor there were two levels (Genotype: WT, RTT; Treatment: sal, met). Abbreviations. WT: wild-type mice; RTT: MeCP2-308 heterozygous female mice; sal: saline; met: metformin; NDUFB8: NADH:Ubiquinone Oxidoreductase Subunit B8; SDHB: Succinate Dehydrogenase Complex Iron Sulfur Subunit B; UQCRC2: Ubiquinol-Cytochrome C Reductase Core Protein II; MTCO1: mitochondrially encoded cytochrome c oxidase I; ATP5A: ATP Synthase, H<sup>+</sup> Transporting, Mitochondrial F1 Complex; HNE-adducts: 4-hydroxy-2-trans-nonanal protein bound; PGC-1α: peroxisome proliferator-activated receptor gamma coactivator 1-alpha; mtTFA: Mitochondrial transcription factor A; OPA1: GTPase Optic Atrophy 1; MFN2: GTPases Mitofusin 2; Nrf2: nuclear respiratory factor 2; HO-1: heme oxygenase-1; GH score: general health score; NS: Not Significant.

**FigureS1:**  
(a)

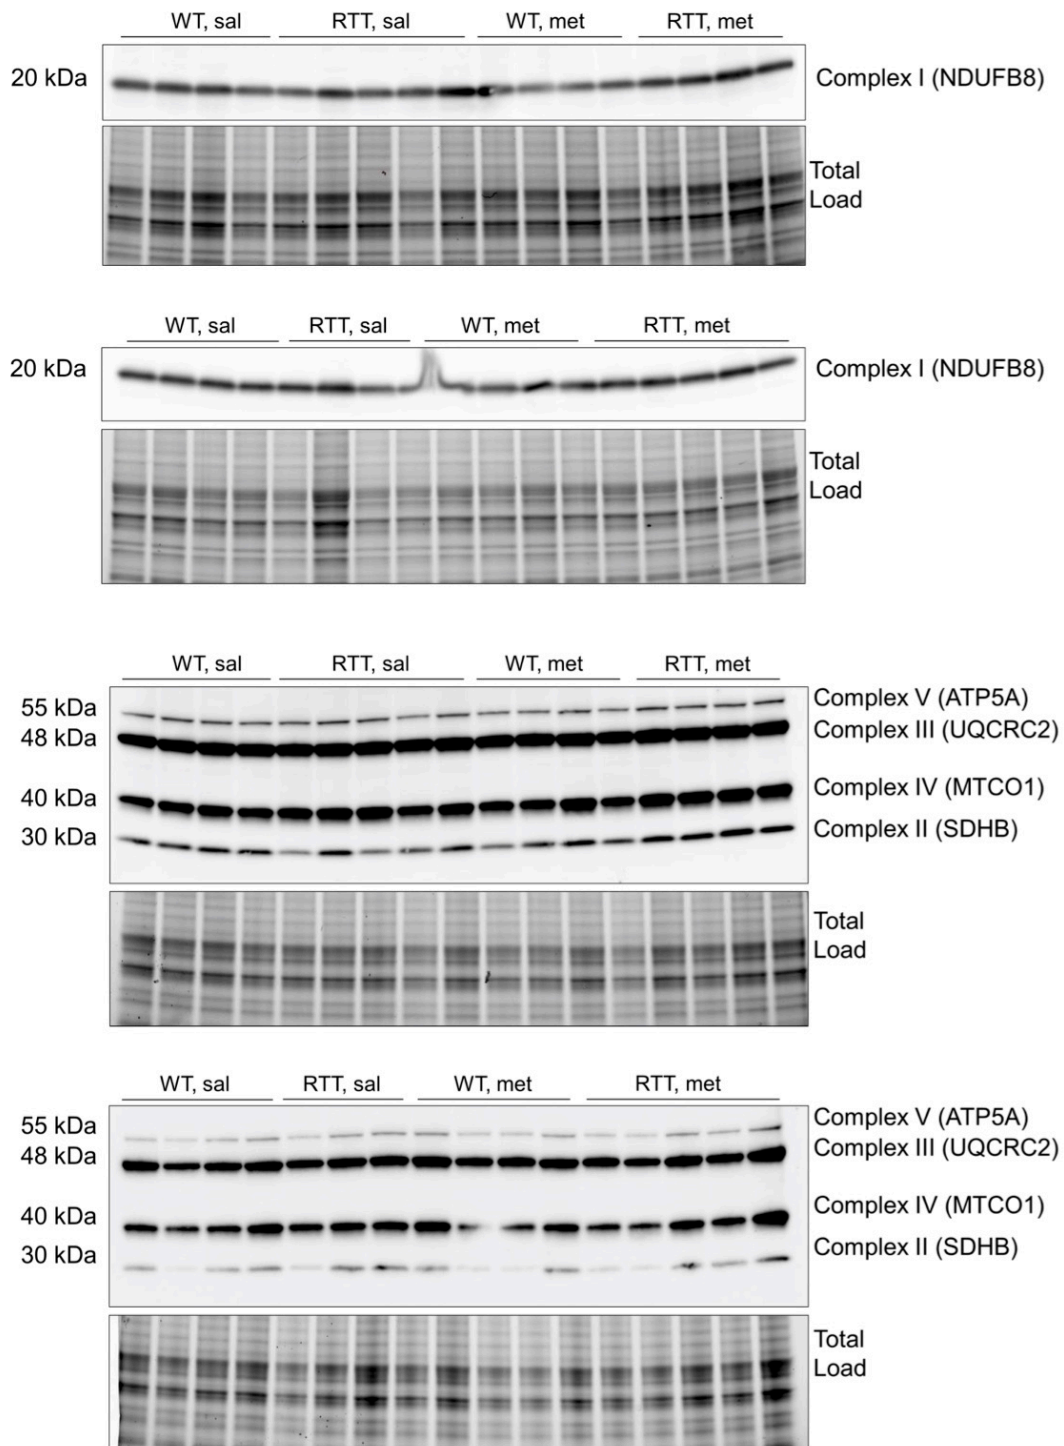

(b)

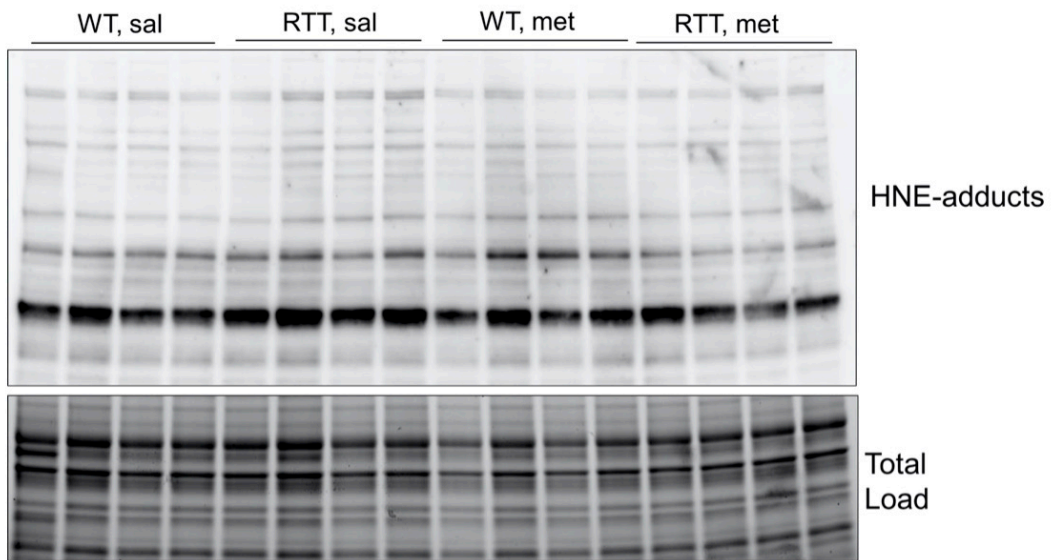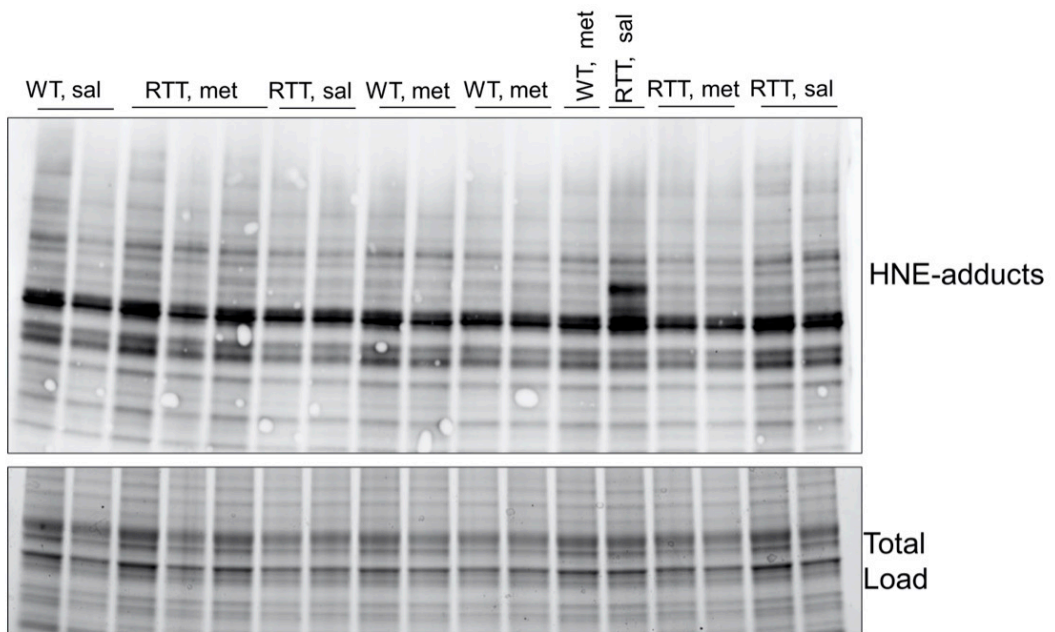

(c)

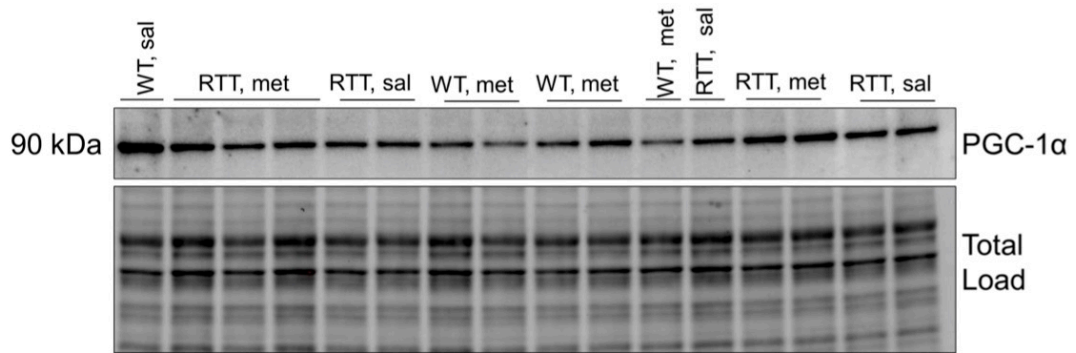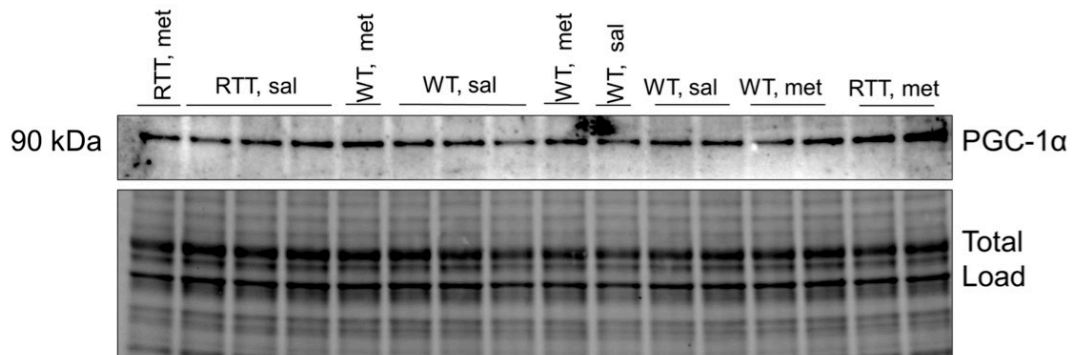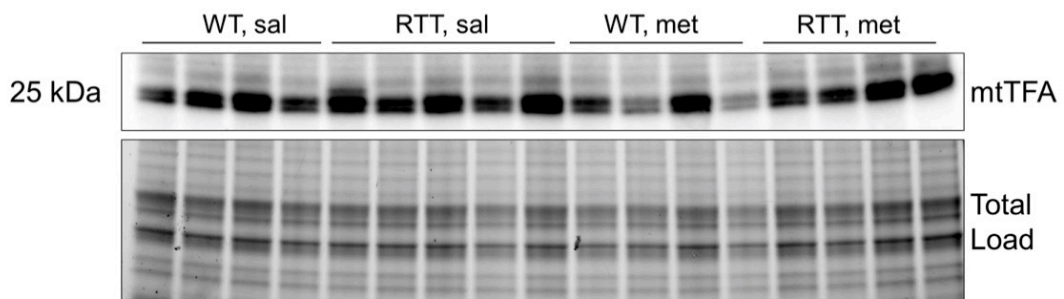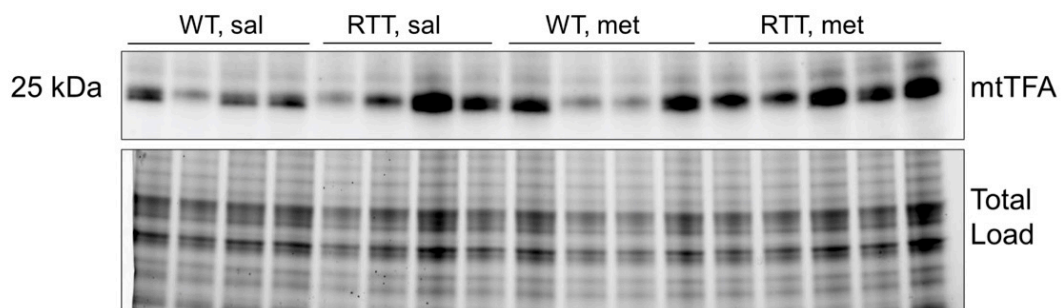

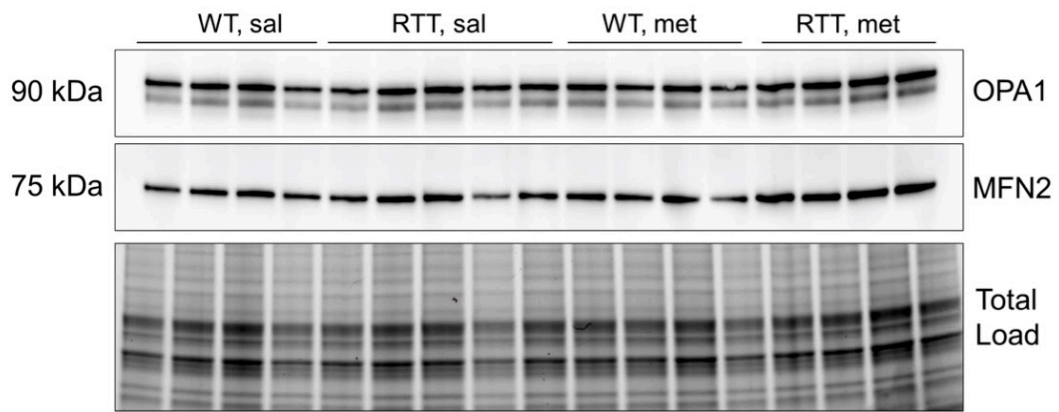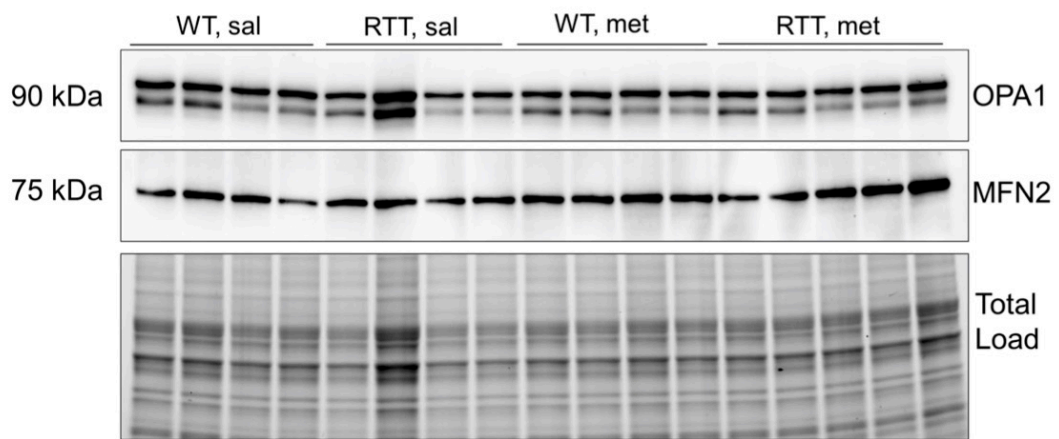



(d)

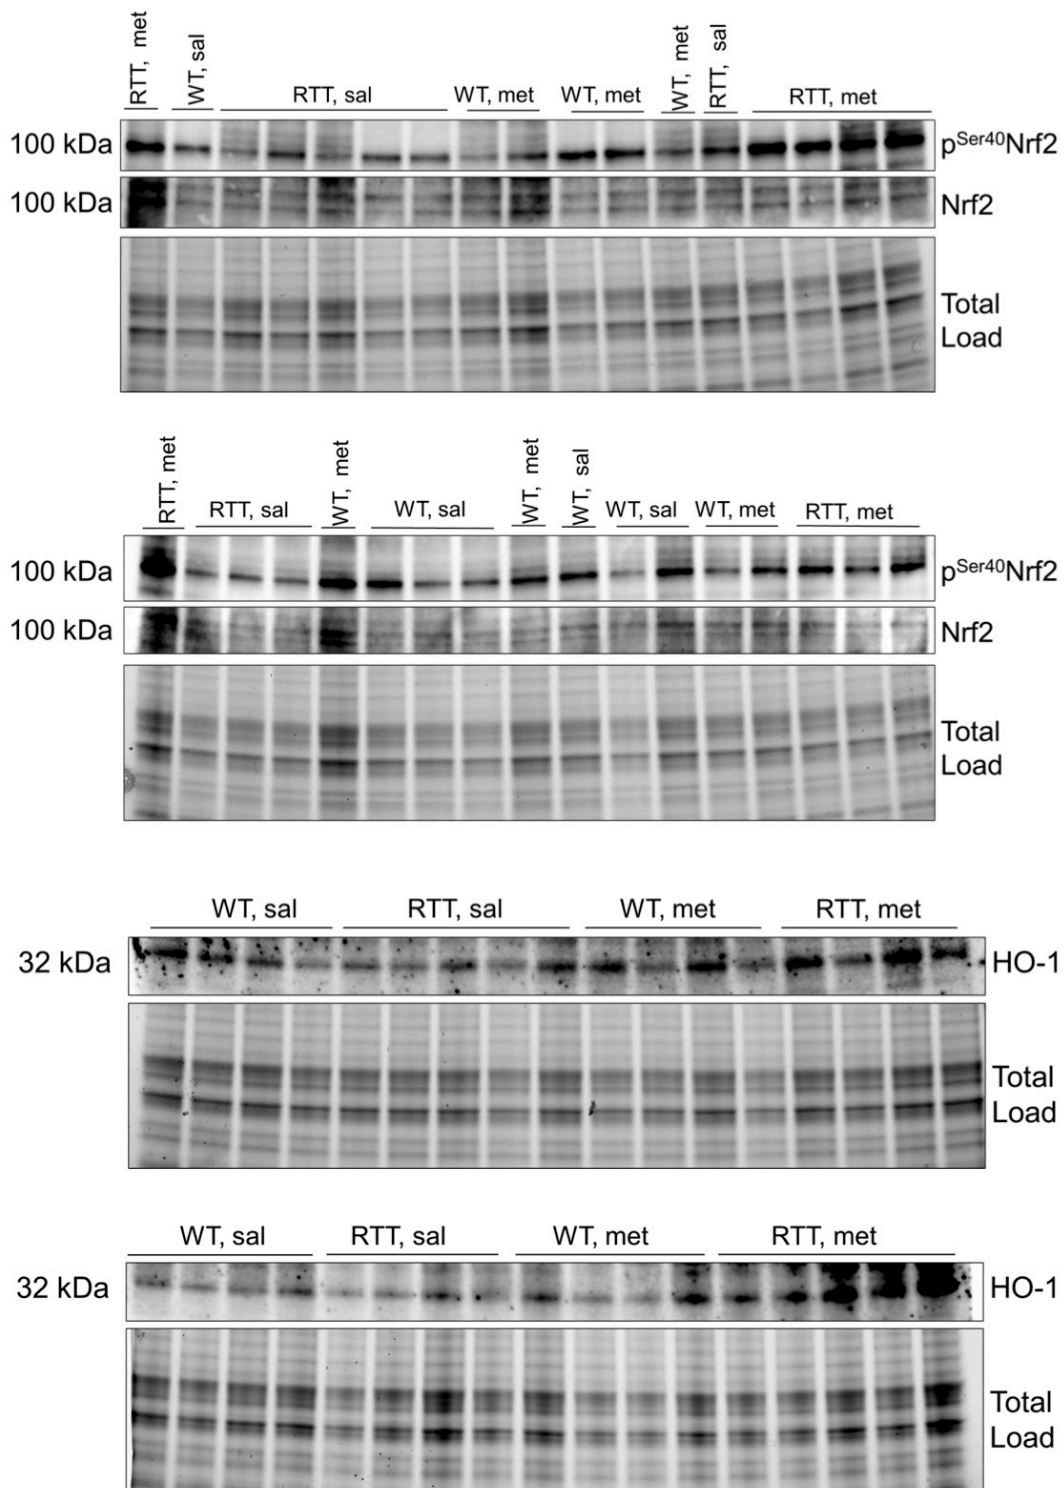

**Figure S1 – Full Immunoblot of Western blot results.**

The full-length blot of (a) Figure 3a, (b) Figure 4b, (c) Figure 5a, (d) Figure 6a. Abbreviations. WT: wild-type mice; RTT: MeCP2-308 heterozygous female mice; sal: saline; met: metformin; NDUFB8: NADH:Ubiquinone Oxidoreductase Subunit B8; SDHB: Succinate Dehydrogenase Complex Iron Sulfur Subunit B; UQCRC2: Ubiquinol-Cytochrome C Reductase Core Protein II; MTCO1: mitochondrially encoded cytochrome c oxidase

I; ATP5A: ATP Synthase, H<sup>+</sup> Transporting, Mitochondrial F1 Complex; HNE-adducts: 4-hydroxy-2-trans-nonenal protein bound; PGC-1 $\alpha$ : peroxisome proliferator-activated receptor gamma coactivator 1-alpha; mtTFA: Mitochondrial transcription factor A; OPA1: GTPase Optic Atrophy 1; MFN2: GTPases Mitofusin 2; Nrf2: nuclear respiratory factor 2; HO-1: heme oxygenase-1.
